# Supplementary material
Source: ML conference proceedings conference paper supplement (https://proceedings.neurips.cc/paper_files/paper/2023/hash/8b07d224a643b02e7571e083578a86d2-Abstract.html)
Supplement: Supplementary file 1 [file 8b07d224a643b02e7571e083578a86d2-Supplemental-Conference.pdf]

## 526 **A Broader Impact**

527 Our work designs privacy attacks, which have the potential to cause harm. However, by making the  
528 vulnerabilities in existing approaches known, and more rigorously evaluating the risk to users, our  
529 work is a necessary step to designing stronger mitigations in the future.

## 530 **B Limitations**

531 The main limitation of our work is the strong threat model under which our attacks work. We use  
532 the same threat model as the “online” version of the LiRA [CCNSTT22] attack. This attack assumes  
533 access to the target examples before training a model, and, for the End-to-End LiRA attack, access  
534 to the student dataset. We use this strong threat model to assess worst-case vulnerability, as prior  
535 work has evaluated distillation under weaker attacks. Another limitation of the attacks is the large  
536 running time of the student query attack from Section 5, which requires thousands of shadow models  
537 to obtain good performance. While generally impractical, we prefer to position this attack as a way  
538 of explaining why distillation propagates membership information, and leave future work to attempt  
539 to improve the attack’s efficiency.

## 540 **C More Experiment Details**

541 All of our results on CIFAR-10 make use of fewer than 30000 trained models. While a very large  
542 number of models, the fast, publicly available training code we use allows us to train this number  
543 of models in fewer than 1 GPU-week (although we decrease the wall-clock time by parallelizing  
544 over 4 GPUs). Our results on Purchase-100 and Texas-100 also use simple models, taking under  
545 1 minute to train (we train all models for 20 epochs with SGD with a learning rate of 0.01 and  
546 momentum parameter of 0.99, which we found to maximize performance over our hyperparameter  
547 sweep). We train 8000 of these models for our analysis, taking fewer than 1 GPU-week for each  
548 of these datasets. Our most expensive attack, relying on only student queries, starts to outperform  
549 random guessing with as few as 100 models, which can be trained on 1 GPU in two hours on all  
550 three of these datasets. Unfortunately, we are unable to make our code public at this time due to  
551 organizational constraints.

## 552 **D Extended Results on Teacher Dataset Privacy**

553 We plot the effectiveness of Transfer LiRA in Figure 7. ROC curves for our student attacks are found  
554 in Figure 8. Further qualitative examples can be found in Figure 9. Ablation of score information  
555 with and without duplicates is plotted in Figure 10. Per-example student attack success rates for  
556 CIFAR-10 with duplicates are found in Figure 11. In Figure 12, we compare our student model  
557 attacks against a simple logit threshold baseline, similar to the loss thresholding attack designed by  
558 Yeom, Giacomelli, Fredrikson, and Jha [YGFJ18], which was used to evaluate distillation privacy  
559 in Shejwalkar and Houmansadr [SH21].

## 560 **E Privacy of Student Training Set**

561 Having evaluated the Private Teacher threat model, we now turn to the Private Student and Self-  
562 Distillation threat models, which we will consider simultaneously. The Private Student threat model  
563 can be used to perform knowledge transfer from large, general purpose models to task-specific  
564 models, by querying on (sensitive) task-specific student data. Self-distillation is often used in appli-  
565 cations of distillation to compress models and improve their performance.

### 566 **E.1 Private Student**

567 The private student threat model does not involve data minimization, unlike the private teacher threat  
568 model; the empirical privacy we investigate here comes instead from an adversary having limited  
569 knowledge of the specifics of the teacher model. That is, the question we investigate is: how much  
570 does the adversary need to know about the teacher model to get reliable attacks on the private student  
571 dataset?

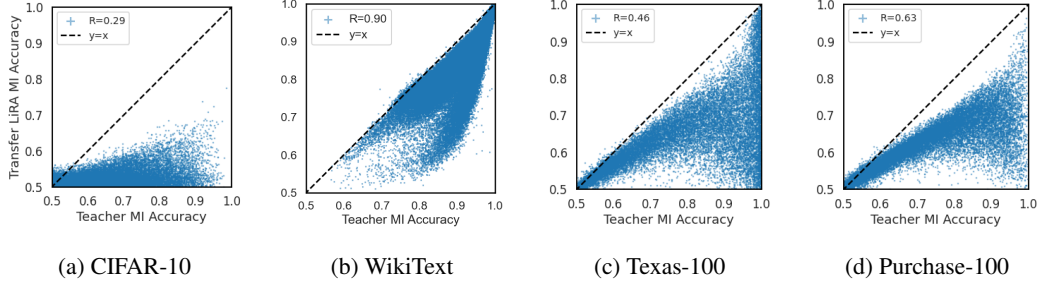

Figure 7: **Many data points do not get privacy benefits from distillation.** With the x axis, we plot the vulnerability of each teacher example to attack before distillation, using teacher models. With the y axis, we plot the vulnerability to attack after distillation, using the Transfer LiRA strategy to attack student models. Observe that many data points lie near the  $y = x$  line, which indicates no reduction in vulnerability from distillation.

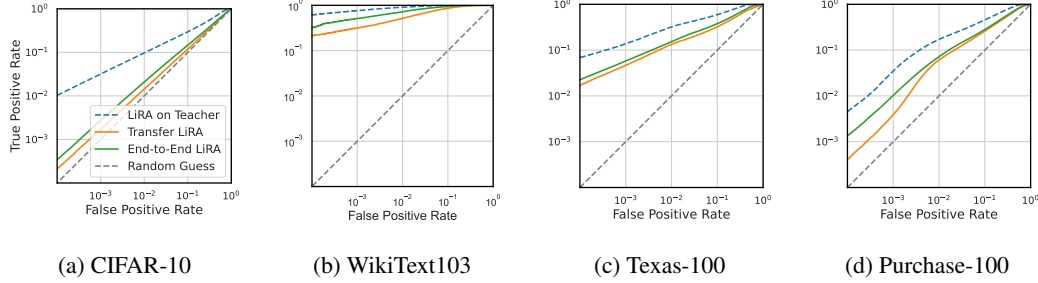

Figure 8: ROC curves for our attacks on student models.

572 We consider three levels of adversarial knowledge: **Known Teacher**, where the adversary knows the  
573 precise teacher model used to query the student examples; **Unknown Teacher**, where the adversary  
574 knows the teacher model is one of a small subset of models; and **Surrogate**, where the adversary can  
575 only collect similar data, to train their own surrogate teacher models. Both the Known and Unknown  
576 Teacher settings reflect a world where the teacher model is one of a small number of general purpose  
577 public models, such as a large language model. The Surrogate setting requires the adversary to train  
578 their own copy.

579 We run the LiRA variants in a number of these settings on the CIFAR-10 dataset, calibrated to the  
580 knowledge the adversary has (for example, in the Surrogate threat model, the adversary trains their  
581 own teacher models, and trains a number of shadow student models to calibrate LiRA). We plot our  
582 results in Figure 13a, and find that, as expected, less knowledge about the teacher model reduces the  
583 adversary’s success at membership inference. However, even the weakest threat model, Surrogate,  
584 allows for powerful attacks, with a TPR as large as  $10^{-2}$  at a FPR of  $10^{-3}$ .

## 585 E.2 Privacy of Self-Distillation

586 Having considered the privacy of the student and teacher datasets independently, we now investi-  
587 gate the common self-distillation setting [FLTIA18; XLHL20], where the student and teachers are  
588 identical. Given that duplicate examples in the student set carry membership information of teacher  
589 examples (Section 6.1), and student examples themselves are not well protected by distillation (Sec-  
590 tion E.1), we do not expect self-distillation to reduce privacy risk significantly. However, a common  
591 technique in self-distillation is to train the student on a loss function which combines the cross en-  
592 tropy loss on the query dataset  $\ell_Q$  with the cross entropy loss on the student examples’ original  
593 “hard labels”  $\ell_S$ . We write  $\ell_\alpha = \alpha\ell_Q + (1 - \alpha)\ell_S$ , so that  $\alpha = 1$  recovers the standard distillation  
594 objective, while  $\alpha = 0$  recovers the standard cross entropy loss (as if there was never a teacher  
595 model).

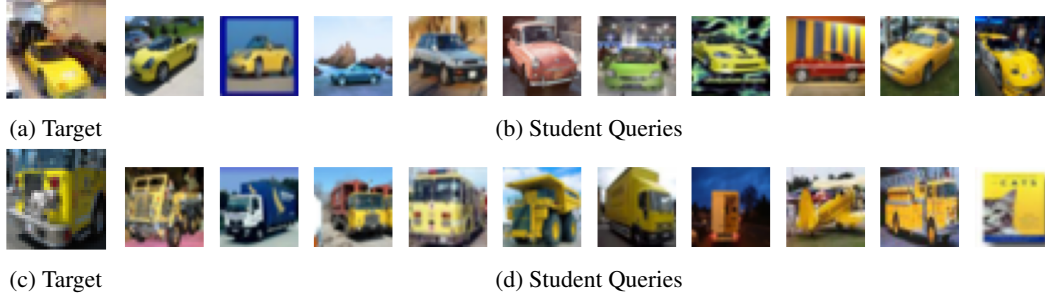

Figure 9: Two examples of target examples for which the most informative student queries are predominantly in the same class. The only exception is the eighth student query in (d) for the yellow truck in (c), which is an airplane. The filtered attack using the displayed student queries reaches 78% accuracy on the yellow automobile in (a), and 74% accuracy on the yellow truck in (c).

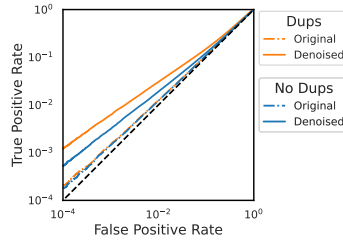

Figure 10: The impact of denoising on duplicated and deduplicated teacher attacks.

596 To evaluate self-distillation, we run LiRA by training shadow student models with the entire self-  
 597 distillation algorithm, using identical datasets for each pair of teacher and student shadow models.  
 598 We perform calibration on these shadow student models, and plot our results at a range of  $\alpha$  values  
 599 in Figure 13b. While we don't observe a large effect, it appears that larger  $\alpha$  (that is, heavier  
 600 reliance on the distillation loss function) results in better attacks. This is likely because relying on  
 601 the distillation loss function reinforces the memorization from the teacher even further in the second  
 602 round of training on the student.

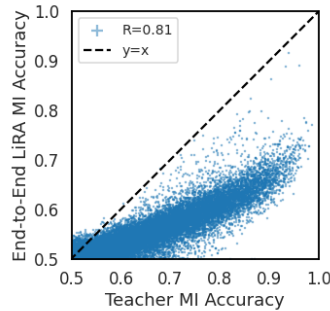

Figure 11: Duplication also has an impact on CIFAR-10 student attacks. Compare with Figure 3a.

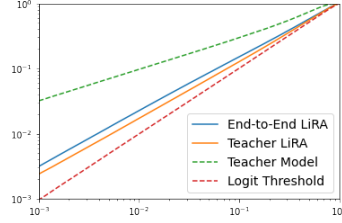

Figure 12: Our attacks outperform a simple logit threshold baseline attack, used by prior work.

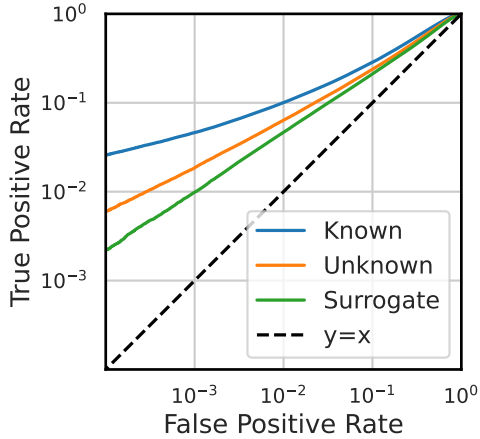

(a) Private Student

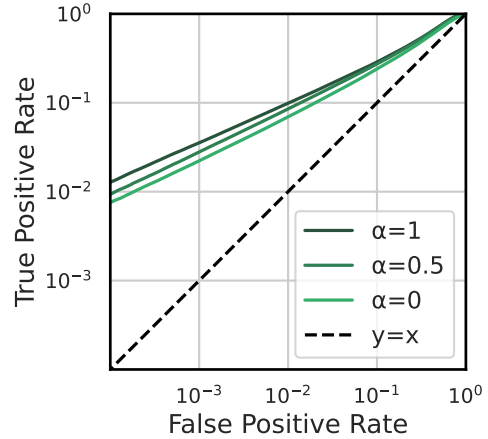

(b) Self-Distillation

Figure 13: *Distillation has limited ability to prevent membership inference* either a) on sensitive student examples, or b) in self-distillation. However, reducing the knowledge available to the adversary seems to help in the Private Student threat model. Results for both on CIFAR-10.
